# Supplementary material for: Dissemination of novel Tn7 family transposons carrying genes for synthesis and uptake of fimsbactin siderophores among Acinetobacter baumannii isolates
Source: PubMed Central journal article supplement (PMC8190619; doi:10.1099/mgen.0.000548), 2021-03-22
Supplement: mgen-7-0548-s001.pdf [file mgen-7-0548-s001.pdf]

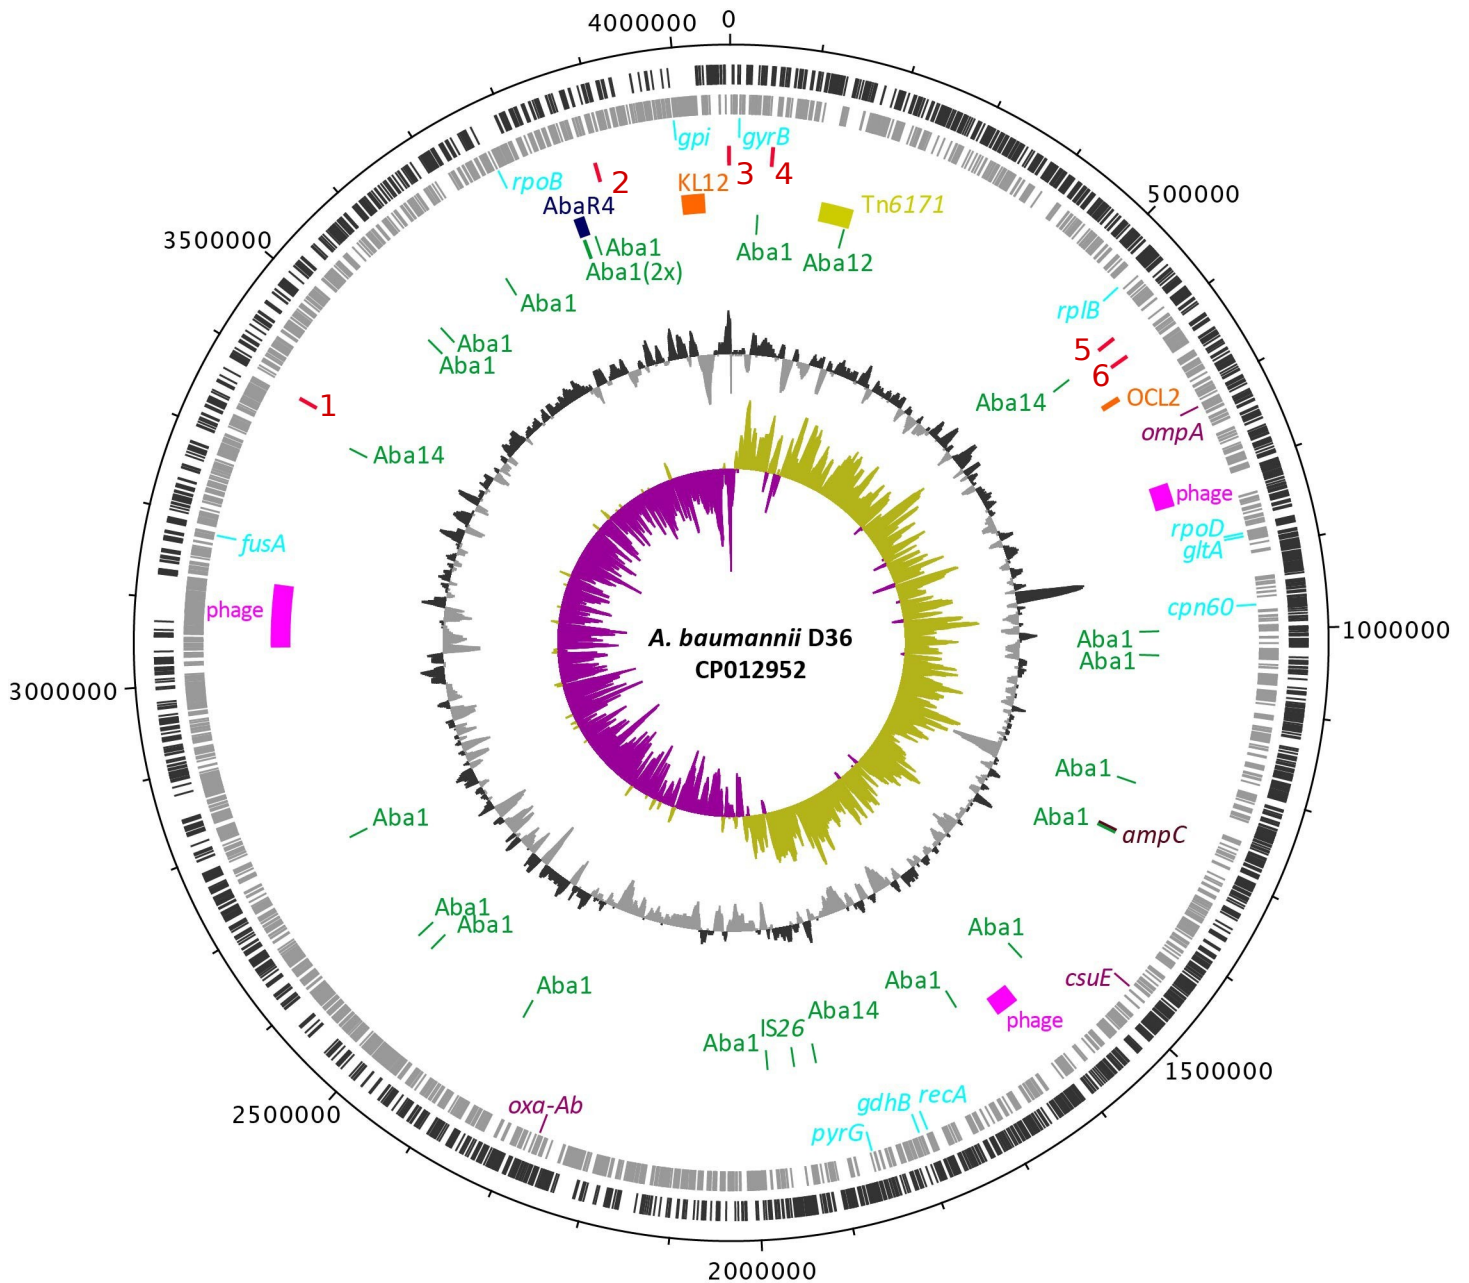

**Fig. S1.** Circular map of the chromosome of *A. baumannii* D36. The outermost ring (ring 1) represents the chromosome with small bars each representing 100 kbp length. Ring 2 and 3 (shown black and grey) represent open reading frames on the positive and negative strains, respectively. Ring 4 (shown grey and black) and 5 (represented mauve and lime) represent GC content and GC skew, respectively. The chromosomal locations of genes used in MLST schemes (Institut Pasteur and Oxford schemes) are shown using small cyan bars with the gene names indicated. All insertion sequences found in the chromosome of D36 are also shown using small green bars with the IS names indicated next to each bar. Prophage genomes, KL and O loci are also shown

using pink and orange boxes with their names appear next to them. Small red bars numbered 1-6 also represent the chromosomal locations of ribosomal RNA (rRNA) genes found in the chromosome of D36. D36 has an inversion between rRNA genes 3 and 4.

**Table S1.** Proteins encoded by Tn6171<sup>a</sup>.

| Coordinates <sup>b</sup> | locus id (AN415) | Product  | Size (aa) <sup>c</sup> | Pfam    | Function                                                                              |
|--------------------------|------------------|----------|------------------------|---------|---------------------------------------------------------------------------------------|
| 182801-183610c           | 00167            | TnsA     | 270                    | 08721-2 | Transposition protein                                                                 |
| 180727-182730c           | 00166            | TnsB     | 668                    | 665     | Transposition protein                                                                 |
| 179081-180730c           | 00165            | TnsC     | 550                    | 11426   | Transposition protein                                                                 |
| 177536-179065c           | 00164            | TnsD     | 510                    | 15978   | Transposition protein                                                                 |
| 175960-177546c           | 00163            | TnsE     | 529                    | 18623   | Transposition protein                                                                 |
| 175497-175724            | 00162            | Tnp1236  | 76                     | 13276   | Putative transposase                                                                  |
| 175121-175285c           | 00161            | Orf      | 55                     | NA      | Unknown                                                                               |
| 174805-174933c           | 00160            | Orf      | 43                     | NA      | Unknown                                                                               |
| 174591-174773c           | 00159            | Orf      | 61                     | NA      | Unknown                                                                               |
| 173894-174232c           | 00158            | Orf      | 113                    | NA      | Unknown                                                                               |
| 173396-173620c           | 00157            | Orf      | 75                     | NA      | Unknown                                                                               |
| 172456-173325c           | 00156            | TnpAba12 | 290                    | 13737   | Transposition protein of ISAb12                                                       |
| 171766-172041c           | 00155            | Orf      | 92                     | NA      | Unknown                                                                               |
| 170540-171688c           | 00154            | RoxA     | 383                    | 8007    | Involved in ribosomal translation, structure and biogenesis                           |
| 169266-170531c           | 00153            | HlyD     | 422                    | 529     | membrane-fusion protein of T1SS                                                       |
| 167145-169262c           | 00152            | SunT     | 706                    | 3412    | Putative ABC-type bacteriocin/antibiotic exporter                                     |
| 165586-166941            | 00151            | FbsQ     | 452                    | 1554    | Multidrug resistance Efflux pump                                                      |
| 164443-165567            | 00150            | FbsP     | 375                    | 4954    | Putative siderophore-interacting protein; ferric reductase                            |
| 163243-164391            | 00149            | FbsO     | 383                    | 7690    | Putative MFS efflux pump                                                              |
| 160916-163123            | 00148            | FbsN     | 736                    | 593     | Ferrichrome-iron receptor                                                             |
| 159932-160693c           | 00147            | FbsM     | 254                    | 975     | Putative iron acquisition Pr; similar to Yersiniabactin synthesis enzyme              |
| 159048-159917c           | 00146            | FbsL     | 290                    | 1648    | Phosphopantetheinyl transferase                                                       |
| 158534-158887            | 00145            | Orf      | 118                    | NA      | Unknown                                                                               |
| 158380-158559            | 00144            | Orf      | 60                     | NA      | Unknown                                                                               |
| 157388-158014            | 00143            | FbsK     | 209                    | 13523   | Siderophore synthetase small component; acetyltransferase                             |
| 156146-157306            | 00142            | FbsJ     | 387                    | 2784    | Ornithine/Arginine decarboxylase                                                      |
| 154796-156136            | 00141            | FbsI     | 447                    | 13434   | Siderophore biosynthesis protein, monooxygenase                                       |
| 153163-154782            | 00140            | FbsH     | 540                    | 501     | 2,3-dihydroxybenzoate-AMP ligase                                                      |
| 149936-153151            | 00139            | FbsG     | 1072                   | 668     | Siderophore biosynthesis non-ribosomal peptide synthetase module                      |
| 146687-149923            | 00138            | FbsF     | 1079                   | 501     | Siderophore biosynthesis non-ribosomal peptide synthetase module - AMP-binding enzyme |
| 144179-146683            | 00137            | FbsE     | 835                    | 550     | Peptide synthetase similar to enterobactin                                            |
| 143374-144165            | 00136            | FbsD     | 264                    | 13561   | 2,3-dihydro-2,3-dihydroxybenzoate                                                     |

|                |       |      |     |       |                                                                             |
|----------------|-------|------|-----|-------|-----------------------------------------------------------------------------|
| 142708-143337  | 00135 | FbsC | 210 | 857   | dehydrogenase<br>Isochorismatase (hydrolase) of<br>siderophore biosynthesis |
| 141441-142616  | 00134 | FbsB | 392 | 425   | Isochorismate synthase of<br>siderophore biosynthesis                       |
| 140138-141064c | 00133 | FbsA | 309 | 12833 | Transcriptional regulator AraC-<br>type                                     |
| 137954-139753c | 00132 | KAP  | 600 | 7693  | Putative NTPase                                                             |
| 137178-137939c | 00131 | Orf  | 254 | NA    | Unknown                                                                     |
| 135863-137185c | 00130 | Orf  | 441 | NA    | Unknown                                                                     |
| 135123-135866c | 00129 | TatD | 248 | 1026  | Putative DNase                                                              |
| 133985-134698c | 00128 | Orf  | 238 | NA    | Unknown                                                                     |

---

<sup>a</sup> located at bases 133828-183749 of GenBank accession no. CP012952.

<sup>b</sup> based on the D36 genome (GenBank accession no. CP012952).

<sup>c</sup> protein size (amino acid).
